# Supplementary material for: Anisotropic mechanical properties of α-MoO3 nanosheets
Source: Royal Society of Chemistry journal article supplement (doi:10.1039/d3nr06427a), 2024-01-01
Supplement: d3nr06427a1.pdf [file d3nr06427a1.pdf]

## Supplementary Information

### Anisotropic mechanical properties of $\alpha$ -MoO<sub>3</sub> nanosheets

Congying Wang<sup>a,b</sup>, Xuwei Cui<sup>a,c</sup>, Shijun Wang<sup>a</sup>, Wenlong Dong<sup>a,b</sup>, Hai Hu<sup>d</sup>, Xiaoyong Cai<sup>d</sup>, Chao Jiang<sup>d</sup>, Zhong Zhang<sup>c,\*</sup> and Luqi Liu,<sup>a,b,\*</sup>

<sup>a</sup> CAS Key Laboratory of Nanosystem and Hierarchical Fabrication and CAS Center for Excellence in Nanoscience, National Center for Nanoscience and Technology, Beijing, 100190, China.

<sup>b</sup> University of Chinese Academy of Sciences, Beijing, 100049, China.

<sup>c</sup> CAS Key Laboratory Mechanical Behavior and Design of Materials, Department of Modern Mechanics, University of Science and Technology of China, Hefei, 230027, China.

<sup>d</sup> CAS Key Laboratory of Standardization and Measurement for Nanotechnology and CAS Center for Excellence in Nanoscience, National Center for Nanoscience and Technology, 100190 Beijing, China.

\* Corresponding author.

\*Address correspondence to Email:

liulq@nanoctr.cn; zhangzhong@ustc.edu.cn

## Section S1. Raman characterization for anisotropic structure of $\alpha$ -MoO<sub>3</sub>.

The lattice orientations of  $\alpha$ -MoO<sub>3</sub> nanosheets were identified through angle resolved polarized Raman spectroscopy (633nm laser) with 10° step. The laser and analyzer are set in parallel configuration and the laboratory coordinate and crystal coordinate are coincident (Fig. S1a). Here, we specify the angle between the direction of incident light and a-axis as  $\theta$ .

For  $\alpha$ -MoO<sub>3</sub>, four of its lattice vibrational modes are Raman active, including A<sub>g</sub>, B<sub>1g</sub>, B<sub>2g</sub>, and B<sub>3g</sub>. We only focus on A<sub>g</sub> and B<sub>2g</sub> modes. The intensity of a given Raman mode is a function of Raman tensor and scattering geometry,

$$I \propto |e_i \cdot R \cdot e_s|^2 \quad (\text{S1})$$

where R is Raman tensor,  $e_i$  and  $e_s$  are the unit vector of incident laser polarization and the scattering phonon polarization, respectively. Here the Raman tensor can be written as

$$R(A_g) = \begin{pmatrix} A & 0 & 0 \\ 0 & B & 0 \\ 0 & 0 & C \end{pmatrix} \quad (\text{S2})$$

$$R(B_{2g}) = \begin{pmatrix} 0 & 0 & E \\ 0 & 0 & 0 \\ E & 0 & 0 \end{pmatrix} \quad (\text{S3})$$

The  $e_i$  is parallel to  $e_s$ , and they can be written as  $e_i = e_s^T = (1 \ 0 \ 0)$ . Because the Raman tensors (R) of a crystal are defined according to its crystal coordinates, it must be converted into laboratory coordinates ( $R'$ ) by  $R' = MRM^T$ , M is defined as a transform matrix,

$$\begin{pmatrix} x \\ y \\ z \end{pmatrix} = M \begin{pmatrix} a \\ b \\ c \end{pmatrix} \quad (\text{S4})$$

$$M = \begin{pmatrix} \cos \theta & 0 & -\sin \theta \\ 0 & 1 & 0 \\ \sin \theta & 0 & \cos \theta \end{pmatrix} \quad (\text{S5})$$

Back substituting into Eq. (S1), the Raman intensity is given by

$$I \propto |e_i \cdot M \cdot R \cdot M^T \cdot e_s|^2 \quad (\text{S6})$$

According to Eq. (S2), Eq. (S3) and Eq. (S6), the intensity of the peaks of two vibrational modes with Raman activity can be expressed by the following Eq S7,

$$I(A_g) \propto (A \cos^2 \theta + C \sin^2 \theta)^2 \quad (S7)$$

$$I(B_{2g}) \propto E^2 \sin^2 2\theta \quad (S8)$$

Fig. 1g, h and Fig. S1b, c present the normalized Raman intensity in the polar representation and theoretical fitting curve according to above description. The intensity period of  $A_g$  mode is  $180^\circ$  and  $B_{2g}$  is  $90^\circ$ . Apparently, the theoretical calculation is in good agreement with the experimental results.

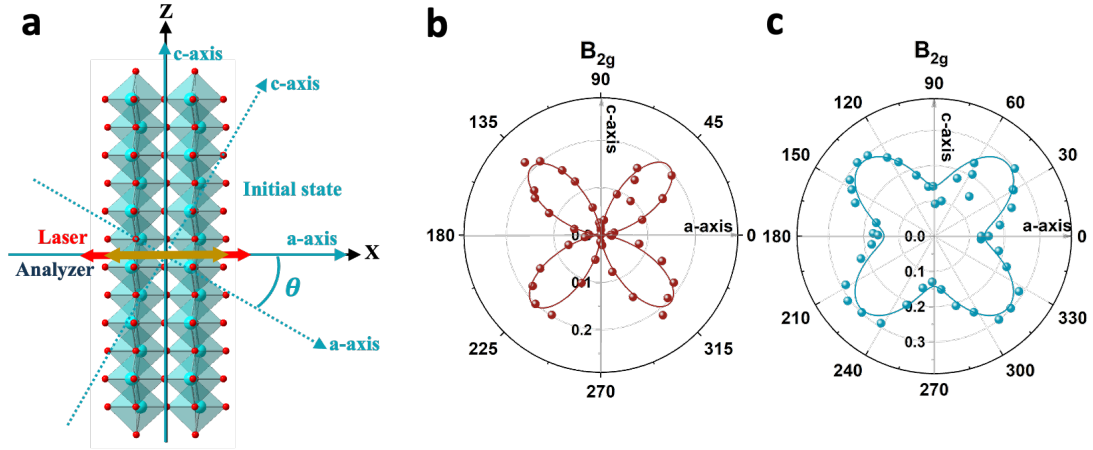

Fig. S1 (a) Structure diagram of angle resolved polarized Raman experiment, black arrows (xz) indicate the laboratory coordinate; green arrows (ac) stand for the crystal coordinate; red arrow represents the incident laser polarization direction; yellow arrow indicates the analyzer direction. (b) Theoretical (solid lines) and experimental (solid circles) profiles of angle-resolved normalized intensities of Raman  $B_{2g}$  ( $115 \text{ cm}^{-1}$ ) and  $B_{2g}$  ( $283 \text{ cm}^{-1}$ ) modes.

## Section S2. The calculation of surface free-energy.

The contact angle is typically measured at the cross-point where a liquid-vapor interface interacts with a solid surface (schematic Fig. S2). The results for the contact angles of different liquids (diiodomethane (DM), water (H<sub>2</sub>O), ethanol (EtOH) and isopropanol (IPA)) on SiO<sub>2</sub>/Si and MoO<sub>3</sub> substrates are summarized in Table S1. In general, the wettability of a solid surface by a liquid can be defined by Young-Dupré equation (Eq. S9),

$$\gamma_{s-l} = \gamma_s - \gamma_l \cos \theta_s \quad (\text{S9})$$

where,  $\gamma_{s-l}$  is the free energy between the substrate and liquid,  $\gamma_s$  is the surface free energy of the substrate,  $\gamma_l$  is the free energy of liquid.  $\theta_s$  is the contact angle between substrate and liquid. Here, the substrates include SiO<sub>2</sub>/Si and MoO<sub>3</sub>, liquids include DM, H<sub>2</sub>O, EtOH and IPA.

In the past several decades, some semi-empirical analytical models have been developed to estimate the surface free energy derived from the contact angles.<sup>1</sup> According to Owens and Wendt model, the surface energy of solids consisted of dispersion and dipole-hydrogen bonding forces.<sup>1</sup> In order to extract the solid-liquid interfacial free energy ( $\gamma_{s-l}$ ) and the solid surface free energy ( $\gamma_s$ ), at least two liquids with known dispersive and polar components of surface tensions are required. Here, H<sub>2</sub>O and DM with well-known polar  $\gamma_l^p$  and dispersion  $\gamma_l^d$  components were used to derive  $\gamma_s$  and  $\gamma_{s-l}$  as presented by the following equations:

$$\gamma_l = \gamma_l^p + \gamma_l^d \quad (\text{S10})$$

$$\gamma_s = \gamma_s^p + \gamma_s^d \quad (\text{S11})$$

$$\gamma_{s-l} = \gamma_s + \gamma_l - 2(\sqrt{\gamma_s^d \gamma_l^d} + \sqrt{\gamma_s^p \gamma_l^p}) \quad (\text{S12})$$

where  $\gamma_s^p$  and  $\gamma_l^p$  are polar components,  $\gamma_s^d$  and  $\gamma_l^d$  are dispersive components of substrate and liquid surface energies, respectively. Based on the measured contacting angles,  $\theta$ , the polar  $\gamma_s^p$  and dispersion  $\gamma_s^d$  components were calculated using Eq. (S13), as derived from Eq. (S9) and Eq. (S12):

$$\gamma_l(1 + \cos \theta) = 2(\sqrt{\gamma_s^d \gamma_l^d} + \sqrt{\gamma_s^p \gamma_l^p}) \quad (\text{S13})$$

Table S2 shows the measured surface energies of SiO<sub>2</sub>/Si and MoO<sub>3</sub>. Then, we could calculate  $\gamma_{SiO_2-MoO_3}$  based on the Eq S14 derived from Young-Dupré equation and Owens-Wendt model<sup>1</sup> to:

$$\gamma_{SiO_2-MoO_3} = (\sqrt{\gamma_{SiO_2}^d} - \sqrt{\gamma_{MoO_3}^d})^2 + (\sqrt{\gamma_{SiO_2}^p} - \sqrt{\gamma_{MoO_3}^p})^2 \quad (S14)$$

Consequently, the calculated value of  $\gamma_{SiO_2-MoO_3}$  is 0.44 mJ/m<sup>2</sup>.

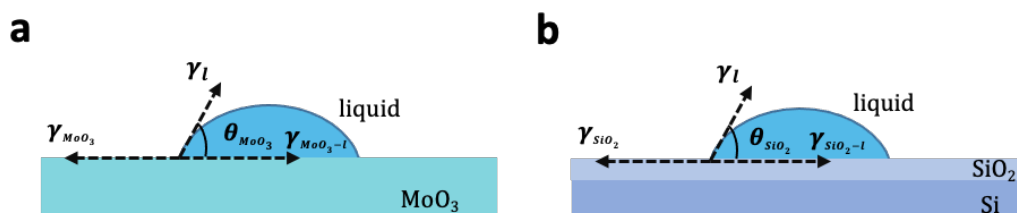

Fig. S2 Schematic showing surface tension equilibrium of a liquid droplet on (a) MoO<sub>3</sub> and (b) SiO<sub>2</sub> surface.

**Table S1. Contact angle of SiO<sub>2</sub>/Si and MoO<sub>3</sub> with different liquids.**

| Substrate        | Contact angle [deg] |                  |      |      |
|------------------|---------------------|------------------|------|------|
|                  | DM                  | H <sub>2</sub> O | EtOH | IPA  |
| SiO <sub>2</sub> | 32.7 ± 0.6          | 30.0 ± 1.0       | 0    | 0    |
| MoO <sub>3</sub> | 31.0                | 26.0             | 31.0 | 20.5 |

**Table S2. Surface free energy of SiO<sub>2</sub>/Si, MoO<sub>3</sub>, DM and H<sub>2</sub>O.**

| Surface energy (mJ/m <sup>2</sup> ) | SiO <sub>2</sub>          | MoO <sub>3</sub>          | DM <sup>1</sup>        | H <sub>2</sub> O <sup>1</sup> |
|-------------------------------------|---------------------------|---------------------------|------------------------|-------------------------------|
| $\gamma^d$                          | 32.6                      | 27.5                      | 49.5                   | 21.8                          |
| $\gamma^p$                          | 33.4                      | 39.0                      | 1.3                    | 51.0                          |
| $\gamma = \gamma^d + \gamma^p$      | 66.0 ( $\gamma_{SiO_2}$ ) | 66.5 ( $\gamma_{MoO_3}$ ) | 50.8 ( $\gamma_{DM}$ ) | 72.8 ( $\gamma_{H_2O}$ )      |

### Section S3. The contact angle measurement.

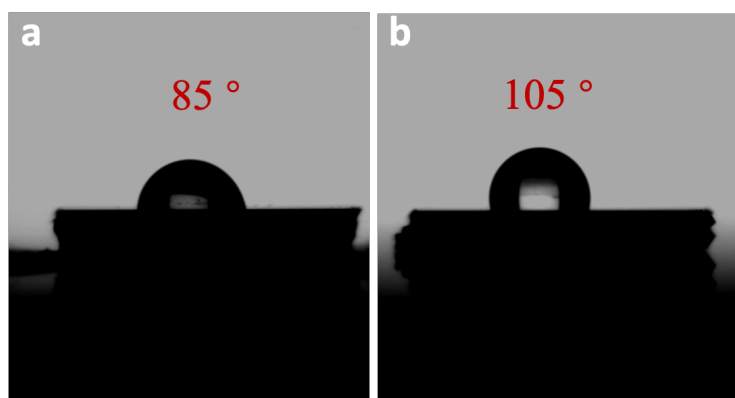

Fig. S3 Contact angles of water on the surface of PTP device: (a) with plasma treatment and (b) without.

#### Section S4. Transfer process of MoO<sub>3</sub>.

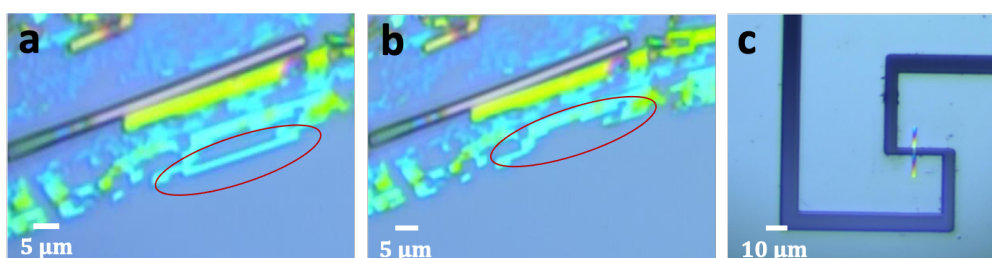

Fig. S4 (a, b) Optical images of MoO<sub>3</sub> nanosheets exfoliated onto SiO<sub>2</sub>/Si substrate. Red circle indicated the MoO<sub>3</sub> before (a) and after transfer (b). (c) MoO<sub>3</sub> nanosheet deposited onto PTP surface.

#### Section S5. Thickness measurement of MoO<sub>3</sub>.

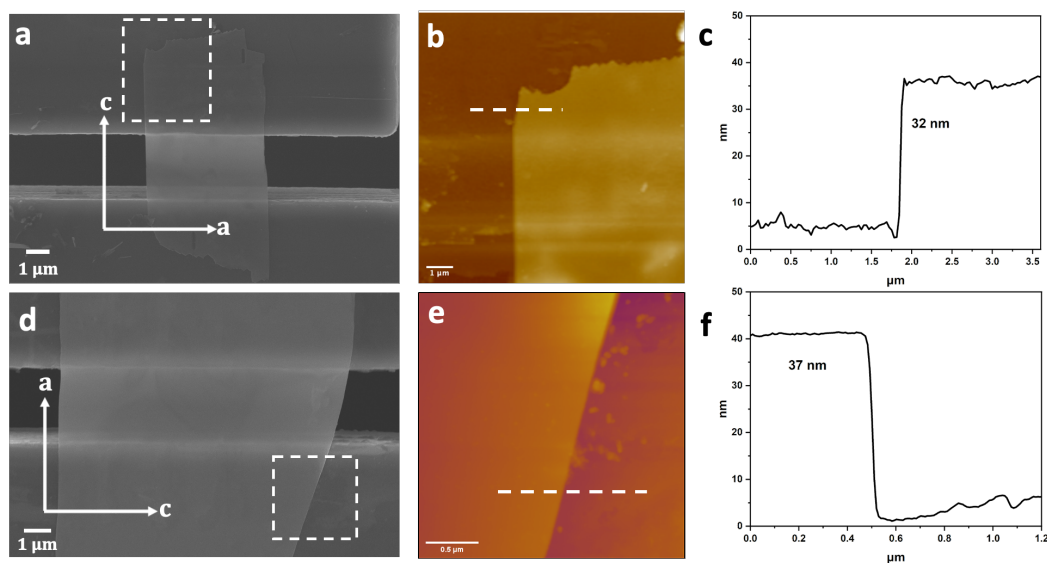

Fig. S5 (a, b) SEM images along c-axis and along a-axis. (b, e) AFM images of MoO<sub>3</sub> for the marked area in (a, b). (c, f) Corresponding height profiles of MoO<sub>3</sub> along dash line.

**Section S6. SEM images of the tested specimens.**

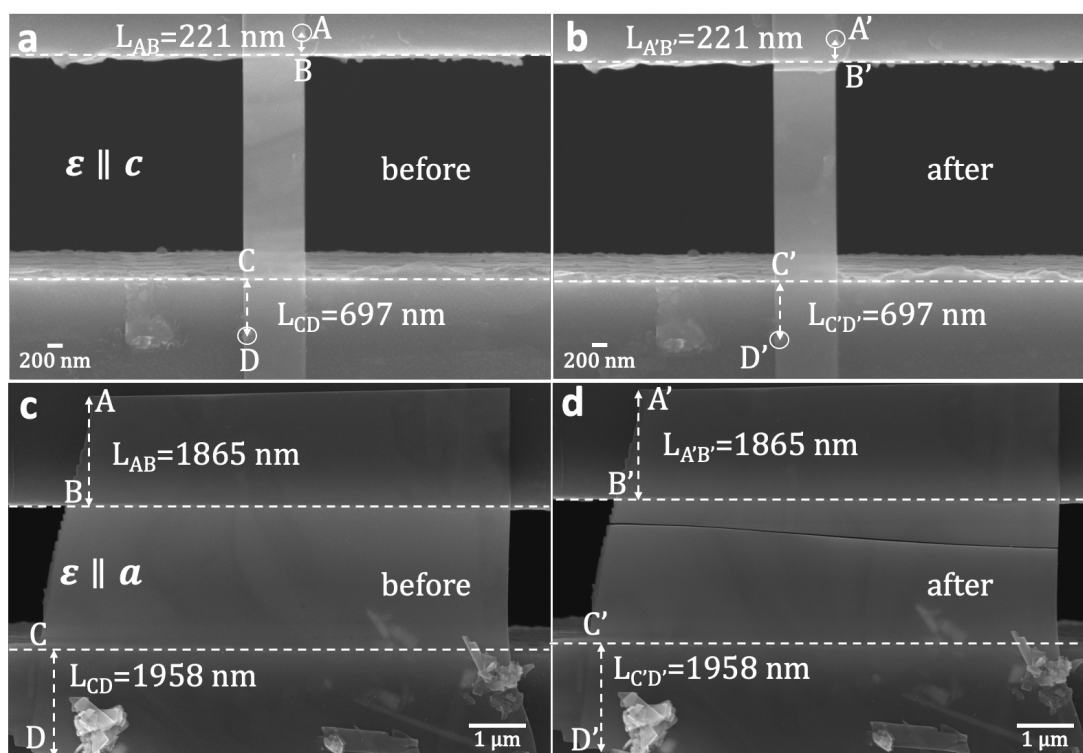

Fig. S6 The SEM images of MoO<sub>3</sub> nanosheets before and after tensile tests (a, b) along c-axis and (c, d) along a-axis. The measured distance:  $L_{AB}=L_{A'B'}= 221 \text{ nm}$ ,  $L_{CD}=L_{C'D'}=697 \text{ nm}$  along c-axis,  $L_{AB}=L_{A'B'}=1865 \text{ nm}$ ,  $L_{CD}=L_{C'D'}=1958 \text{ nm}$  along a-axis.

**Section S7. Anisotropy ratio of Young's modulus of various anisotropic 2D materials.**

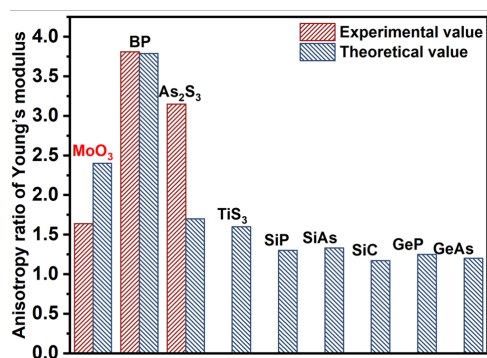

Fig. S7 Summary of in-plane anisotropy ratio of Young's modulus of various anisotropic 2D materials ( $\text{MoO}_3$ , BP,<sup>3</sup>  $\text{As}_2\text{S}_3$ ,<sup>4,5</sup>  $\text{TiS}_3$ ,<sup>6</sup>  $\text{SiP}$ ,<sup>7</sup>  $\text{SiAs}$ ,<sup>7</sup>  $\text{SiC}$ ,<sup>8</sup>  $\text{GeP}$ <sup>7</sup> and  $\text{GeAs}$ <sup>7</sup>).

**Section S8. Size effect of fracture strength.**

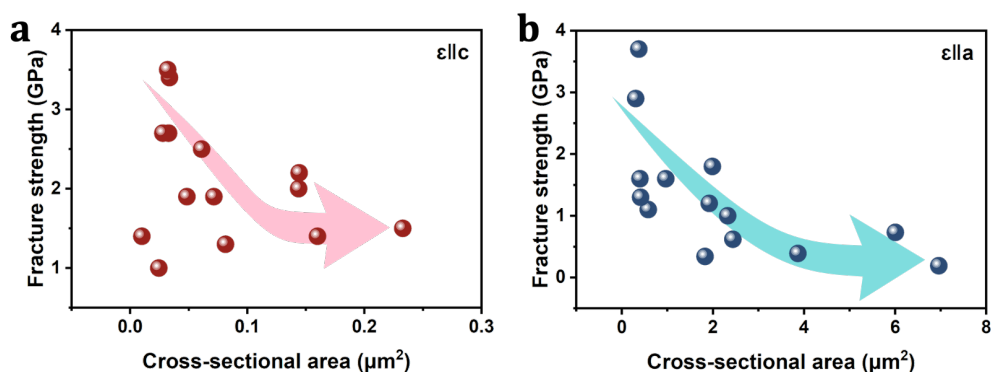

Fig. S8 Fracture strength of  $\text{MoO}_3$  nanosheets as a function of cross-sectional area: (a) along c-axis and (b) along a-axis. The arrows are plotted to guide the eye.

**Section S9. Characterization of FIB-Cut  $\text{MoO}_3$  before and after tensile test.**

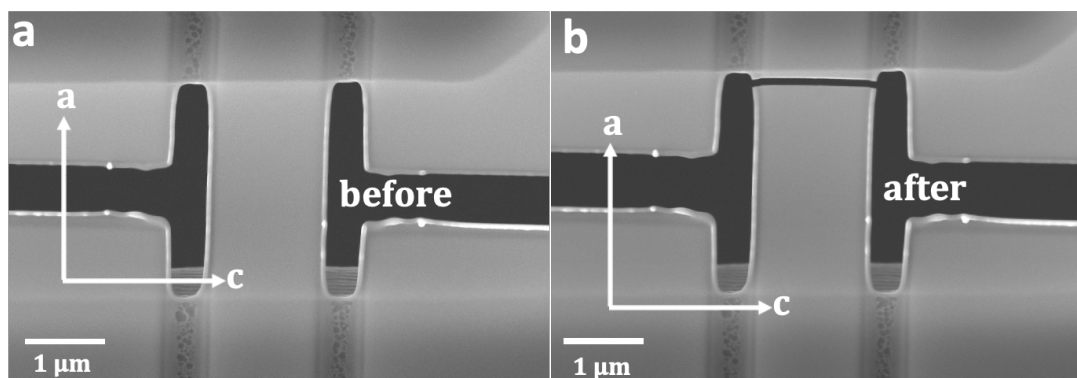

Fig. S9 (a, b) SEM images of  $\text{MoO}_3$  trimmed by FIB before and after fracture along a-axis.



**Table S3. Geometry and mechanical properties of MoO<sub>3</sub>.**

| Sample                         | Width<br>( $\mu\text{m}$ ) | Thickness<br>(nm) | Young' s<br>modulus<br>(GPa) | Fracture<br>strength<br>(GPa) | Fracture<br>Strain<br>(%) |
|--------------------------------|----------------------------|-------------------|------------------------------|-------------------------------|---------------------------|
| $\varepsilon \parallel c - 1$  | 5.0                        | 32                | 96.4                         | 1.4                           | 1.4                       |
| $\varepsilon \parallel c - 2$  | 0.3                        | 33                | 75.5                         | 1.4                           | 1.8                       |
| $\varepsilon \parallel c - 3$  | 0.8                        | 41                | 84.4                         | 2.7                           | 3.3                       |
| $\varepsilon \parallel c - 4$  | 0.8                        | 41                | 119.0                        | 3.5                           | 2.8                       |
| $\varepsilon \parallel c - 5$  | 0.6                        | 44                | 89.8                         | 2.7                           | 3.2                       |
| $\varepsilon \parallel c - 6$  | 0.5                        | 49                | 85.2                         | 1.0                           | 1.9                       |
| $\varepsilon \parallel c - 7$  | 0.6                        | 56                | 105.5                        | 3.4                           | 2.9                       |
| $\varepsilon \parallel c - 8$  | 1.0                        | 61                | 103.9                        | 2.5                           | 2.3                       |
| $\varepsilon \parallel c - 9$  | 0.8                        | 64                | 78                           | 1.9                           | 2.5                       |
| $\varepsilon \parallel c - 10$ | 1.1                        | 74                | 56.8                         | 1.3                           | 2.0                       |
| $\varepsilon \parallel c - 11$ | 2.0                        | 74                | 59.6                         | 2.2                           | 3.7                       |
| $\varepsilon \parallel c - 12$ | 1.6                        | 88                | 60.1                         | 2.0                           | 3.3                       |
| $\varepsilon \parallel c - 13$ | 2.3                        | 103               | 62.9                         | 1.5                           | 2.1                       |
| $\varepsilon \parallel c - 14$ | 0.5                        | 143               | 64.7                         | 1.9                           | 2.9                       |
| $\varepsilon \parallel a - 1$  | 8.5                        | 36                | 53.3                         | 0.9                           | 2.9                       |
| $\varepsilon \parallel a - 2$  | 10.1                       | 37                | 61.2                         | 1.4                           | 3.7                       |
| $\varepsilon \parallel a - 3$  | 14.9                       | 39                | 66.2                         | 0.4                           | 1.1                       |
| $\varepsilon \parallel a - 4$  | 9.4                        | 44                | 57.6                         | 0.6                           | 1.3                       |
| $\varepsilon \parallel a - 5$  | 8.0                        | 50                | 41.0                         | 0.6                           | 1.6                       |
| $\varepsilon \parallel a - 6$  | 10.0                       | 105               | 61.2                         | 1.4                           | 2.2                       |
| $\varepsilon \parallel a - 7$  | 15.5                       | 150               | 35.2                         | 1.0                           | 2.9                       |
| $\varepsilon \parallel a - 8$  | 10.5                       | 174               | 22.8                         | 0.3                           | 1.2                       |
| $\varepsilon \parallel a - 9$  | 12.2                       | 200               | 22.8                         | 0.6                           | 2.6                       |
| $\varepsilon \parallel a - 10$ | 9.8                        | 203               | 40.3                         | 1.8                           | 4.0                       |

|                                     |      |     |      |     |     |
|-------------------------------------|------|-----|------|-----|-----|
| $\varepsilon \parallel a - 11$      | 18.5 | 209 | 48.4 | 0.4 | 0.8 |
| $\varepsilon \parallel a - 12$      | 9.8  | 203 | 40.3 | 1.8 | 4.0 |
| $\varepsilon \parallel a - 13$      | 18.5 | 209 | 48.4 | 0.4 | 0.8 |
| $\varepsilon \parallel a - 14$      | 14   | 404 | 14.3 | 0.8 | 2.6 |
| $\varepsilon \parallel a - 1$ (FIB) | 1.6  | 96  | 44.7 | 0.7 | 1.2 |

**Supplementary Video S1.** Fracture of  $\alpha$ -MoO<sub>3</sub> under *in situ* SEM tensile loading.

### References

1. D. K. Owens and R. C. Wendt, *J. Appl. Polymer. Sci.*, 1969, **13**, 1741-1747.
2. S. Puebla, R. D'Agosta, G. Sanchez-Santolino, R. Frisenda, C. Munuera and A. Castellanos-Gomez, *NPJ 2D Mater. and Appl.*, 2021, **5**, 37.
3. X. Cui, W. Dong, S. Feng, G. Wang, C. Wang, S. Wang, Y. Zhou, X. Qiu, L. Liu, Z. Xu and Z. Zhang, *Small*, 2023, **19**, 202301959.
4. M. Siskins, M. Lee, F. Alijani, M. R. van Blankenstein, D. Davidovikj, H. S. J. van der Zant and P. G. Steeneken, *ACS Nano*, 2019, **13**, 10845-10851.
5. M. Dong, Y. Sun, D. J. Dunstan and D. G. Papageorgiou, *Nanoscale*, 2022, **14**, 7872-7880.
6. J. Zhang, X. Liu, Y. Wen, L. Shi, R. Chen, H. Liu and B. Shan, *ACS Appl. Mater. Inter.*, 2017, **9**, 2509-2515.
7. B. Mortazavi and T. Rabczuk, *Physica E. Low. Dimens. Syst. and Nanost.*, 2018, **103**, 273-278.
8. A. S. M. J. Islam, M. S. Islam, N. Ferdous, J. Park, A. G. Bhuiyan and A. Hashimoto, *Mater. Res. Express*, 2019, **6**, 125073.
